# Supplementary material for: Stable Isotope and Element Profiling for Determining the Agroclimatic Origin of Cow Milk within a Tropical Country
Source: MDPI journal article supplement (doi:10.3390/foods11030275), 2022-01-20
Supplement: s1 [file foods-1437066-supplementary-Table S1.xlsx]

## Sheet: Stable isotope data
The whole dataset of authentic milk sample analysis including the description of the lo-cation, Stable isotopes ratios of C, N, H, and O.
S/N	Agroclimatic_zone	Sampling_period	latitudes	Longitudes	Altitudes	Farm_ID	Sample_ID	Sampling_Month	d15NAIR_Milk	d15NAIR_Casein	d15NAIR_Whey	d13CVPDB_Milk	d13CVPDB_Fat	d13CVPDB_Casein	d13CVPDB_Whey	d2HAir_Milk	d18OVSMOW_Milk
			N	E	m
1	Up_Country	Dry	6.919	80.6051	1323	U1	U-N-1-1	December,2016	5.84	6.545	5.58	-24.915	-28.265	-21.995	-22.975	-86.41	18.73
2	Up_Country	Dry	6.919	80.6051	1323	U1	U-N-1-2	December,2016	6.58	7.05	5.53	-25.66	-28.64	-23.98	-23.42	-87.21	19.06
3	Up_Country	Dry	6.919	80.6051	1323	U1	U-N-1-3	December,2016	6.45	6.92	4.82	-22.52	-26.81	-20.42	-21.77	-86.63	18.86
4	Up_Country	Dry	6.8428	80.7168	1544	U2	U-N-2-1	December,2016	6.53	6.49	5.02	-22.18	-24.38	-20.05	-20.4	-92.12	17.81
5	Up_Country	Dry	6.8428	80.7168	1544	U2	U-N-2-2	December,2016	5.52	6.31	4.15	-24.67	-25.34	-20.99	-21.62	-108.85	17.66
6	Up_Country	Dry	6.8428	80.7168	1544	U2	U-N-2-3	December,2016	6.36	6.49	4.54	-20.84	-24.11	-19.64	-20.5	-97.55	17.61
7	Up_Country	Dry	6.8298	80.7472	1615	U3	U-N-3-1	December,2016	5.84	6.42	4.88	-21.06	-24.61	-19.49	-20.39	-71.87	17.88
8	Up_Country	Dry	6.8298	80.7472	1615	U3	U-N-3-2	December,2016	6.02	6.15	4.55	-21.5	-23.85	-19.4	-20.07	-85.43	17.62
9	Up_Country	Dry	6.8298	80.7472	1615	U3	U-N-3-3	December,2016	5.65	5.97	4.64	-21.41	-24.84	-20.46	-21.02	-82.97	17.67
10	Up_Country	Dry	6.8932	80.583	1287	U4	U-P-1-1	December,2016	5.34	5.35	3.95	-24.86	-27.17	-22.72	-23.39	-90.28	18.72
11	Up_Country	Dry	6.8932	80.583	1287	U4	U-P-1-2	December,2016	6.37	6.38	3.95	-23.13	-27.14	-22.385	-23.39	-91.38	17.98
12	Up_Country	Dry	6.8908	80.8026	1848	U5	U-P-2-1	December,2016	5.06	5.97	4.08	-21.46	-24.52	-21.06	-19.77	-95.62	16.97
13	Up_Country	Dry	6.8908	80.8026	1848	U5	U-P-2-2	December,2016	6.03	6.06	4.56	-20.04	-24.68	-19.88	-19.57	-95.14	16.72
14	Up_Country	Dry	6.8585	80.8309	1895	U6	U-P-3-1	December,2016	5.55	6.38	5.03	-20.46	-22.46	-19.24	-18.49	-104.22	17.39
15	Up_Country	Dry	6.8585	80.8309	1895	U6	U-P-3-2	December,2016	5.51	6.16	4.47	-18.64	-22.36	-18.45	-18.12	-100.15	17.88
16	Up_Country	Wet	6.919	80.6051	1323	U1	U-N-4-1	April, 2016	8.71	5.96	5.1	-22.6	-26.18	-20.91	-21.52	-99.75	20.23
17	Up_Country	Wet	6.919	80.6051	1323	U1	U-N-4-2	April, 2016	7.99	5.96	5.6	-23.66	-28.98	-20.91	-22.09	-99.75	20.23
18	Up_Country	Wet	6.919	80.6051	1323	U1	U-N-4-3	April, 2016	9.6	5.6	5.54	-26.39	-27.21	-21.32	-21.97	-99.75	20.23
19	Up_Country	Wet	6.8428	80.7168	1544	U2	U-N-5-1	April, 2016	6.34	2.95	4.97	-22.35	-24.03	-19	-20.13	-79	18.23
20	Up_Country	Wet	6.8428	80.7168	1544	U2	U-N-5-2	April, 2016	7.77	4.42	4.11	-21.24	-24.07	-19.1	-20.59	-101.39	19.03
21	Up_Country	Wet	6.8428	80.7168	1544	U2	U-N-5-3	April, 2016	8.36	3.87	4.23	-20.2	-26.92	-19.73	-20.82	-101.39	19.03
22	Up_Country	Wet	6.8298	80.7472	1615	U3	U-N-6-1	April, 2016	8.51	4.47	4.87	-22.57	-24	-19.43	-20.68	-96.93	20.57
23	Up_Country	Wet	6.8298	80.7472	1615	U3	U-N-6-3	April, 2016	8.1	5.41	4.73	-20.84	-24.8	-18.73	-19.72	-96.48	20.4
24	Up_Country	Wet	6.8932	80.583	1287	U4	U-P-4-1	April, 2016	9.61	4.43	4.27	-24.93	-26.56	-21.82	-23.38	-97.62	20.13
25	Up_Country	Wet	6.8932	80.583	1287	U4	U-P-4-2	April, 2016	6.17	4.33	4.95	-24.67	-27.65	-21.91	-23.54	-95.84	20.08
26	Up_Country	Wet	6.8932	80.583	1287	U4	U-P-4-3	April, 2016	5.87	4.25	4.41	-24.71	-28.26	-21.98	-23.44	-78.24	20.51
27	Up_Country	Wet	6.8908	80.8026	1848	U5	U-P-5-1	April, 2016	11.56	4.67	4.31	-18.35	-23.45	-18.89	-19.05	-110.79	18.98
28	Up_Country	Wet	6.8908	80.8026	1848	U5	U-P-5-2	April, 2016	5.8	5.05	4.04	-21.19	-24.96	-19.21	-19.75	-124.41	18.94
29	Up_Country	Wet	6.8908	80.8026	1848	U5	U-P-5-3	April, 2016	4.42	3.15	3.42	-19.62	-21.32	-17.71	-18.03	-111.03	18.88
30	Up_Country	Wet	6.8585	80.8309	1895	U6	U-P-6-1	April, 2016	4.79	4.49	3.37	-20.54	-22.41	-18.65	-19.41	-73.15	18.75
31	Up_Country	Wet	6.8585	80.8309	1895	U6	U-P-6-2	April, 2016	4	4.09	3.42	-21.19	-24.03	-19.7	-20.17	-73.15	18.75
32	Up_Country	Wet	6.8585	80.8309	1895	U6	U-P-6-3	April, 2016	5.04	3.63	3.66	-20.69	-24.78	-19.05	-19.59	-73.15	18.75
33	Dry_Zone	Dry	7.9147	81.036	62	D1	D-N-1-1	June,2015	6.7	7.06	5.57	-20.81	-22.93	-16.52	-18.63	-108.77	24.73
34	Dry_Zone	Dry	7.9147	81.036	62	D1	D-N-1-2	June,2015	6.55	6.88	5.37	-20.06	-22.47	-16.27	-18.03	-102.75	24.68
35	Dry_Zone	Dry	7.9147	81.036	62	D1	D-N-1-3	June,2015	6.46	6.94	5.78	-19.16	-22.88	-16.51	-18.32	-112.5	24.36
36	Dry_Zone	Dry	8.4307	80.2562	74	D2	D-N-2-1	June,2015	7.2	7.64	6.11	-22.58	-24.21	-16.81	-20.01	-109.65	23.77
37	Dry_Zone	Dry	8.4307	80.2562	74	D2	D-N-2-2	June,2015	7.04	7.38	5.74	-23.02	-24.36	-17.93	-19.55	-108.13	24
38	Dry_Zone	Dry	8.4307	80.2562	74	D2	D-N-2-3	June,2015	7.125	7.285	6	-23.04	-24.555	-17.83	-19.695	-108.92	23.92
39	Dry_Zone	Dry	8.4558	80.4135	87	D3	D-N-3-1	June,2015	7.21	7.84	6.71	-20.97	-23.69	-16.91	-19.25	-102.16	23.4
40	Dry_Zone	Dry	8.4558	80.4135	87	D3	D-N-3-2	June,2015	7.55	8.03	6.38	-20.8	-22.7	-15.95	-18.14	-101.65	23.38
41	Dry_Zone	Dry	8.4558	80.4135	87	D3	D-N-3-3	June,2015	7.58	7.94	6.44	-20.78	-23.78	-16.86	-18.72	-109.68	23.13
42	Dry_Zone	Dry	7.9637	81.3546	30	D4	D-P-1-1	June,2015	7.75	8.16	7.48	-20.19	-25.8	-16.28	-17.71	-78.9	22.77
43	Dry_Zone	Dry	7.9637	81.3546	30	D4	D-P-1-2	June,2015	8.29	8.84	7.43	-19.62	-24.61	-15.73	-17.73	-103.14	22.61
44	Dry_Zone	Dry	7.9637	81.3546	30	D4	D-P-1-3	June,2015	7.82	8.34	7.71	-21.7	-23.62	-14.82	-16.03	-90.79	22.61
45	Dry_Zone	Dry	8.3034	80.4089	98	D5	D-P-A-1	June,2015	8.22	8.42	6.94	-24.68	-26.05	-21.48	-24.46	-99.84	24.77
46	Dry_Zone	Dry	8.3034	80.4089	98	D5	D-P-A-2	June,2015	8.37	8.55	7.56	-25.54	-25.62	-20.97	-23.96	-96.33	25.19
47	Dry_Zone	Dry	8.3034	80.4089	98	D5	D-P-A-3	June,2015	8.33	8.77	7.92	-24.53	-26.1	-21.77	-24.28	-92.76	25.1
48	Dry_Zone	Dry	8.3434	80.2562	93	D6	D-P-B-1	June,2015	8.715	9.11	7.54	-19.065	-22.065	-16	-18.67	-63.32	26
49	Dry_Zone	Dry	8.3434	80.2562	93	D6	D-P-B-2	June,2015	8.32	8.65	7.25	-20.07	-21.64	-16.26	-18.34	-75.7	25.79
50	Dry_Zone	Dry	8.3434	80.2562	93	D6	D-P-B-3	June,2015	8.97	9.45	8.58	-19.61	-21.51	-15.95	-18.28	-69.78	25.34
51	Dry_Zone	Dry	8.4584	80.414	92	D7	D-P-C-1	June,2015	9.27	9.74	8.13	-17.15	-19.89	-13.34	-15.61	-69.05	25.97
52	Dry_Zone	Dry	8.4584	80.414	92	D7	D-P-C-2	June,2015	9.33	9.44	8.68	-17.16	-20.27	-13.95	-15.91	-81.45	25.07
53	Dry_Zone	Dry	8.4584	80.414	92	D7	D-P-C-3	June,2015	9.26	9.55	8.67	-18.26	-20.42	-13.7	-15.38	-83.06	24.29
54	Dry_Zone	Wet	8.4307	80.2562	74	D1	D-1-1	December,2015	7.99	9.57	7.53	-22.4	-24.36	-21.47	-21.35	-86.65	24.12
55	Dry_Zone	Wet	8.4307	80.2562	74	D1	D-1-2	December,2015	7.88	9.3	6.53	-20.37	-22.39	-20.21	-19.6	-88.27	24.51
56	Dry_Zone	Wet	8.4307	80.2562	74	D1	D-1-3	December,2015	6.62	8.85	6.17	-22.36	-23.89	-21.03	-20.1	-72.62	24.25
57	Dry_Zone	Wet	8.4558	80.4135	87	D2	D-2-1	December,2015	7.85	8.8	6.23	-19.79	-22.49	-17.73	-19.74	-118.43	23.73
58	Dry_Zone	Wet	8.4558	80.4135	87	D2	D-2-2	December,2015	6.7	8.55	6.83	-21.95	-23.55	-16.25	-19.07	-128.7	23.58
59	Dry_Zone	Wet	8.4558	80.4135	87	D2	D-2-3	December,2015	7.41	9.05	6.52	-20.46	-23.09	-16.68	-18.87	-122.9	23.86
60	Dry_Zone	Wet	7.9637	81.3546	30	D3	D-3-1	December,2015	7.71	9.51	6.9	-21.21	-20.84	-18.48	-21.6	-85.82	24.19
61	Dry_Zone	Wet	7.9637	81.3546	30	D3	D-3-2	December,2015	8.4	9.14	6.68	-22.1	-24.21	-18.36	-22.21	-86.51	23.49
62	Dry_Zone	Wet	7.9637	81.3546	30	D3	D-3-3	December,2015	8.02	9.88	6.98	-23.23	-24.23	-19.3	-22.77	-73.34	23.96
63	Dry_Zone	Wet	8.3034	80.4089	98	D4	D-4-1	December,2015	6.77	8.72	6.1	-19.94	-22.28	-15.38	-18.15	-93.48	25.07
64	Dry_Zone	Wet	8.3034	80.4089	98	D4	D-4-2	December,2015	7.71	9.25	6.59	-20.63	-22.85	-17.02	-19.32	-93.48	25.07
65	Dry_Zone	Wet	8.3034	80.4089	98	D4	D-4-3	December,2015	7.1	8.97	6.82	-21.07	-23.2	-17.56	-19.12	-101.33	25.42
66	Dry_Zone	Wet	8.3434	80.2562	93	D5	D-5-1	December,2015	10.22	11.26	8.92	-15.48	-19.6	-14.95	-14.29	-91.39	24.2
67	Dry_Zone	Wet	8.3434	80.2562	93	D5	D-5-2	December,2015	8.66	10.23	8.29	-17.03	-19.19	-16.38	-15.89	-90.4	24.08
68	Dry_Zone	Wet	8.3434	80.2562	93	D5	D-5-3	December,2015	10.67	11.94	9.62	-17.17	-19.28	-13.84	-14.39	-86.04	24.42
69	Dry_Zone	Wet	8.4584	80.414	92	D6	D-6-1	December,2015	11.54	10.25	7.88	-18.75	-20.58	-16.53	-16.75	-82.65	23.55
70	Dry_Zone	Wet	8.4584	80.414	92	D6	D-6-2	December,2015	11.54	12.55	7.9	-18.75	-22.09	-16.85	-16.77	-82.65	22.63
71	Mid_Country	Wet	7.2555	80.7801	450	M1	M-1-1	January,2016	6.53	33.19	6.47	-22.37	-25.64	-25.79	-21.44	-74.54	21.38
72	Mid_Country	Wet	7.2555	80.7801	450	M1	M-1-2	January,2016	6.2	4.19	5.24	-21.92	-26.03	-18.76	-21.52	-81.19	21.34
73	Mid_Country	Wet	7.2555	80.7801	450	M1	M-1-3	January,2016	5.55	5.23	4.66	-23.2	-25.99	-19.37	-22.35	-73.75	21.83
74	Mid_Country	Wet	7.2699	80.7201	446	M2	M-2-1	January,2016	8.44	9.45	7.58	-19.66	-22.94	-16.16	-18.5	-104.93	19.18
75	Mid_Country	Wet	7.2699	80.7201	446	M2	M-2-2	January,2016	7.78	7.78	6.71	-20.02	-22.15	-15.48	-18.11	-130.88	18.9
76	Mid_Country	Wet	7.2699	80.7201	446	M2	M-2-3	January,2016	7.32	7.73	6.71	-20.67	-22.25	-15.86	-18.47	-126.67	18.65
77	Mid_Country	Wet	7.2409	80.7163	487	M3	M-3-1	January,2016	5.11	3.45	4.13	-21.41	-22.57	-18.83	-21.02	-143.02	19.72
78	Mid_Country	Wet	7.2409	80.7163	487	M3	M-3-2	January,2016	4.71	4.18	4.14	-22.05	-22.95	-19.07	-21.26	-153.74	18.53
79	Mid_Country	Wet	7.2409	80.7163	487	M3	M-3-3	January,2016	5.39	4.14	4.91	-20.76	-22.01	-18.12	-20.12	-155.46	18.98
80	Mid_Country	Wet	7.2524	80.6058	597	M4	M-4-1	January,2016	4.97	4.66	4.79	-25.85	-28.56	-22.83	-25.68	-95.44	19.33
81	Mid_Country	Wet	7.2524	80.6058	597	M4	M-4-2	January,2016	5.29	3.64	3.73	-26.7	-29.59	-22.28	-25.76	-86.42	19.1
82	Mid_Country	Wet	7.2524	80.6058	597	M4	M-4-3	January,2016	5.91	6.41	5.18	-23.76	-26.48	-18.32	-20.34	-95.35	18.55
83	Mid_Country	Wet	7.2527	80.6084	584	M5	M-5-1	January,2016	4.96	4.69	2.62	-24.9	-27.3	-20.01	-22.9	-110.33	19.14
84	Mid_Country	Wet	7.2527	80.6084	584	M5	M-5-2	January,2016	5.25	4.06	3.69	-24.36	-27.83	-20.65	-23.87	-99.29	19.71
85	Mid_Country	Wet	7.2527	80.6084	584	M5	M-5-3	January,2016	5.67	5.3	3.43	-24.66	-27.52	-19.39	-22.4	-135.07	19.18
86	Mid_Country	Wet	7.267	80.6009	480	M6	M-6-1	January,2016	7.57	6.48	7.75	-22.7	-24.87	-18.07	-21.14	-102.21	19.36
87	Mid_Country	Wet	7.267	80.6009	480	M6	M-6-2	January,2016	7.9	6.87	6.16	-23.56	-25.6	-19.45	-23.41	-112.62	19.11
88	Mid_Country	Wet	7.267	80.6009	480	M6	M-6-3	January,2016	7.81	7.03	6.78	-22.63	-24.82	-18.27	-21.24	-111.72	19.51
89	Mid_Country	Dry	7.2555	80.7801	450	M1	M-7-1	June,2016	5.19	6.55	3.49	-24.56	-26.68	-20.65	-22.97	-121.65	20.69
90	Mid_Country	Dry	7.2555	80.7801	450	M1	M-7-2	June,2016	5.53	7.03	4.63	-25.26	-26.27	-19.97	-22.28	-119.11	20.7
91	Mid_Country	Dry	7.2555	80.7801	450	M1	M-7-3	June,2016	5.84	6.83	4.54	-23.77	-26.41	-19.87	-22.79	-119.11	21.19
92	Mid_Country	Dry	7.2699	80.7201	446	M2	M-8-1	June,2016	5.8	7.48	4.82	-21.44	-23.27	-16.21	-18.83	-82.86	20.42
93	Mid_Country	Dry	7.2699	80.7201	446	M2	M-8-2	June,2016	7.34	8.33	5.11	-20.82	-23.39	-17.81	-20.61	-95.39	20.31
94	Mid_Country	Dry	7.2699	80.7201	446	M2	M-8-3	June,2016	8.62	9.01	6.71	-19.64	-22.21	-16.27	-18.31	-96.39	20.49
95	Mid_Country	Dry	7.2409	80.7163	487	M3	M-9-1	June,2016	4	4.95	1.9	-20.07	-22.35	-15.85	-18.92	-127.87	20.77
96	Mid_Country	Dry	7.2409	80.7163	487	M3	M-9-2	June,2016	3.34	4.37	2.24	-20.62	-22.42	-16.08	-18.98	-125.85	19.87
97	Mid_Country	Dry	7.2409	80.7163	487	M3	M-9-3	June,2016	3.7	4.54	2.52	-19.36	-22.51	-16.37	-18.51	-127.2	20.13
98	Mid_Country	Dry	7.2524	80.6058	597	M4	M-10-1	June,2016	5.97	6.85	4.79	-25.15	-28.77	-20.36	-23.89	-119.4	19.99
99	Mid_Country	Dry	7.2524	80.6058	597	M4	M-10-2	June,2016	4.74	6.43	4.4	-27.7	-28.73	-21.2	-24.36	-110.09	19.96
100	Mid_Country	Dry	7.2524	80.6058	597	M4	M-10-3	June,2016	5.3	6.62	3.93	-25.5	-27.85	-20.76	-23.84	-104.67	20.58
101	Mid_Country	Dry	7.2527	80.6084	584	M5	M-11-1	June,2016	5.2	6.83	3.58	-21.57	-25.36	-17.79	-20.18	-111.56	19.82
102	Mid_Country	Dry	7.2527	80.6084	584	M5	M-11-2	June,2016	5.25	6.83	3.62	-22.11	-25.17	-17.79	-20.39	-98.66	20.64
103	Mid_Country	Dry	7.2527	80.6084	584	M5	M-11-3	June,2016	5.25	7.82	4.4	-22.11	-25.65	-18.26	-21.38	-113.29	20.04
104	Mid_Country	Dry	7.267	80.6009	480	M6	M-12-1	June,2016	7.68	8.94	5.47	-20.76	-23.02	-17.32	-20.53	-75.03	20.45
105	Mid_Country	Dry	7.267	80.6009	480	M6	M-12-2	June,2016	7.36	9.77	5.78	-20.63	-22.55	-16.28	-18.84	-84.26	21.17
106	Mid_Country	Dry	7.267	80.6009	480	M6	M-12-3	September,2016	8.09	9.59	5.43	-20.69	-23.57	-17.18	-20.07	-80.33	21.4
107	Coconut_Triangle	Wet	7.2968	80.0007	40	C1	C-N-1-1	September,2016	5.78	10.4	4.68	-18.83	-21.62	-18.17	-17.07	-110.07	22.96
108	Coconut_Triangle	Wet	7.2968	80.0007	40	C1	C-N-1-2	September,2016	5.51	11.02	4.73	-19	-21.27	-16.83	-16.88	-113.86	21.7
109	Coconut_Triangle	Wet	7.2968	80.0007	40	C1	C-N-1-3	September,2016	6.07	11.14	4.82	-19.74	-22.03	-17.25	-17.79	-113.28	22.46
110	Coconut_Triangle	Wet	7.3886	80.1067	75	C2	C-N-2-1	September,2016	5.94	5.82	4.66	-23.33	-25.87	-21.23	-21.43	-94.23	22.49
111	Coconut_Triangle	Wet	7.3886	80.1067	75	C2	C-N-2-2	September,2016	5.92	6.96	4.76	-22.33	-24.44	-21.25	-19.68	-93.61	22.67
112	Coconut_Triangle	Wet	7.3886	80.1067	75	C2	C-N-2-3	September,2016	6.09	6.88	4.9	-21.53	-24.18	-21.39	-19.27	-95.11	22.66
113	Coconut_Triangle	Wet	7.7337	80.1375	59	C3	C-N-3-1	September,2016	7.45	6.62	5.78	-22.53	-25.98	-23.31	-19.97	-95.31	24.62
114	Coconut_Triangle	Wet	7.7337	80.1375	59	C3	C-N-3-2	September,2016	7.09	6.79	5.75	-21.38	-24.09	-23.19	-18.99	-96.77	24.32
115	Coconut_Triangle	Wet	7.7337	80.1375	59	C3	C-N-3-3	September,2016	7.2	5.89	5.86	-23.39	-26.48	-22.42	-19.89	-98.35	23.93
116	Coconut_Triangle	Wet	7.9254	80.1754	71	C4	C-P-1-1	September,2016	9.79	6.43	8.46	-22.72	-27.52	-15.06	-20.9	-74.22	24.37
117	Coconut_Triangle	Wet	7.9254	80.1754	71	C4	C-P-1-2	September,2016	10.19	6.26	9.03	-21.5	-25.5	-14.93	-19.37	-75.08	24.62
118	Coconut_Triangle	Wet	7.9254	80.1754	71	C4	C-P-1-3	September,2016	10.82	6.43	9.2	-21.68	-26.24	-15.6	-19.84	-75.87	24.72
119	Coconut_Triangle	Wet	7.5741	80.3827	103	C5	C-P-2-1	September,2016	5.31	6.67	4.29	-23.49	-24.76	-19.22	-22.47	-119.04	21.22
120	Coconut_Triangle	Wet	7.5741	80.3827	103	C5	C-P-2-2	September,2016	6.27	6.59	5.29	-23.17	-24.49	-18.05	-22.86	-99.17	21.92
121	Coconut_Triangle	Wet	7.5741	80.3827	103	C5	C-P-2-3	September,2016	6.29	6.68	5.45	-23.58	-24.26	-17.6	-22.98	-118.75	21.15
122	Coconut_Triangle	Wet	7.5767	80.3893	106	C6	C-P-3-1	September,2016	5.76	8.02	4.97	-27.09	-30.32	-18.29	-25.21	-74.54	22.18
123	Coconut_Triangle	Wet	7.5767	80.3893	106	C6	C-P-3-2	September,2016	4.86	7.52	4.55	-25.45	-29.34	-16.96	-24.84	-67.5	21.62
124	Coconut_Triangle	Wet	7.5767	80.3893	106	C6	C-P-3-3	September,2016	6.21	7.76	3.59	-26.68	-29.13	-18.71	-24.02	-48.67	21.77
125	Coconut_Triangle	Dry	7.2968	80.0007	40	C1	C-N-4-1	July,2016	5.39	4.79	4.71	-21.24	-23.69	-16.58	-21.52	-135.51	20.85
126	Coconut_Triangle	Dry	7.2968	80.0007	40	C1	C-N-4-2	July,2016	6.2	6.71	6.3	-21.81	-22.72	-19.6	-18.52	-136.47	20.75
127	Coconut_Triangle	Dry	7.2968	80.0007	40	C1	C-N-4-3	July,2016	5.84	7	4.65	-21.76	-24.92	-16.85	-19.36	-135.64	20.79
128	Coconut_Triangle	Dry	7.3886	80.1067	75	C2	C-N-5-1	July,2016	5.16	6.52	4.64	-22.43	-26.04	-18.93	-20.3	-113.56	21.86
129	Coconut_Triangle	Dry	7.3886	80.1067	75	C2	C-N-5-2	July,2016	5.14	6.56	4.35	-23.63	-25.83	-20.6	-21.1	-125.03	20.94
130	Coconut_Triangle	Dry	7.3886	80.1067	75	C2	C-N-5-3	July,2016	5.51	6.64	4.41	-23.25	-25.78	-18.45	-19.67	-111.59	21.9
131	Coconut_Triangle	Dry	7.7337	80.1375	59	C3	C-N-6-1	July,2016	5.79	7.48	5.09	-24.42	-27.38	-19.49	-21.41	-105.06	21.81
132	Coconut_Triangle	Dry	7.7337	80.1375	59	C3	C-N-6-2	July,2016	6.58	7.69	4.51	-24.85	-29.01	-19.31	-24.17	-104.1	22.3
133	Coconut_Triangle	Dry	7.7337	80.1375	59	C3	C-N-6-3	July,2016	6.36	7.92	5.73	-24.59	-28.38	-18.8	-20.2	-103.9	22.53
134	Coconut_Triangle	Dry	7.9254	80.1754	71	C4	C-P-4-1	July,2016	5.94	6.95	4.68	-23.94	-27.45	-20.45	-20.96	-97.55	23.13
135	Coconut_Triangle	Dry	7.9254	80.1754	71	C4	C-P-4-2	July,2016	5.87	6.84	5.1	-22.71	-28.07	-19.17	-19.4	-97.55	23.13
136	Coconut_Triangle	Dry	7.9254	80.1754	71	C4	C-P-4-3	July,2016	5.46	6.66	5.1	-23.15	-27.22	-19.51	-19.4	-97.55	23.13
137	Coconut_Triangle	Dry	7.5741	80.3827	103	C5	C-P-5-1	July,2016	5.06	3.87	4.57	-24.58	-27.54	-21.8	-22.85	-93.8	21
138	Coconut_Triangle	Dry	7.5741	80.3827	103	C5	C-P-5-2	July,2016	4.42	5.17	3.68	-23.94	-26.91	-22.97	-22.63	-99.89	21.51
139	Coconut_Triangle	Dry	7.5741	80.3827	103	C5	CP-5-3	July,2016	4.3	4.95	4.62	-24.19	-26.77	-22.88	-22.78	-98.55	21.72
140	Coconut_Triangle	Dry	7.5767	80.3893	106	C6	C-P-6-1	July,2016	5.43	5.24	4.78	-27.24	-24.05	-23.07	-24.09	-111.41	20.41
141	Coconut_Triangle	Dry	7.5767	80.3893	106	C6	C-P-6-2	July,2016	5.68	6.08	5.86	-26.91	-28.29	-23.94	-23.57	-116.37	20.44
142	Coconut_Triangle	Dry	7.5767	80.3893	106	C6	C-P-6-3	July,2016	4.81	6.11	5.55	-27.96	-29.91	-25.82	-23.89	-109.33	20.76

## Sheet: Trace element data
Elemental fingerprints of milk samples deter-mined by IRMS and ICP-MS respectively.
S/N	Agroclimatic_zone	Sampling_period	latitudes	Longitudes	Altitudes	Farm_ID	Sample_ID	Sampling_Month	Li	Al	Cr	Mn	Fe	Co	Ni	Cu	Zn	As	Se	Sr	Cd	Ba	Pb	Bi
			N	E	m				(μg L−1)	(μg L−1)	(μg L−1)	(μg L−1)	(μg L−1)	(μg L−1)	(μg L−1)	(μg L−1)	(μg L−1)	(μg L−1)	(μg L−1)	(μg L−1)	(μg L−1)	(μg L−1)	(μg L−1)	(μg L−1)
1	Up_Country	Dry	6.919	80.6051	1323	U1	U-N-1-2	December,2016	2.70135	588.028	25.2312	25.3527	746.814	0.363702	44.317	138.731	1716.64	0.103718	10.1784	185.099	1.75178	277.848	25.7708	8.63751
2	Up_Country	Dry	6.919	80.6051	1323	U1	U-N-1-3	December,2016	0.950963	2042.51	37.3518	28.4044	997.008	1.12661	73.9541	19.1446	2436.82	2.03885	7.37745	152.264	0.603544	227.705	15.1624	0.2
3	Up_Country	Dry	6.8428	80.7168	1544	U2	U-N-2-2	December,2016	0.675336	506.22	19.933	25.1605	438.88	0.319738	8.17645	43.4192	1594.99	0.414873	12.0202	183.295	0.868635	318.815	14.3003	15.8597
4	Up_Country	Dry	6.8428	80.7168	1544	U2	U-N-2-3	December,2016	0.950963	1746.17	50.7316	19.5131	1009.09	0.981598	88.3644	2.65241	1630.34	1.22331	8.30877	168.423	0.570013	277.758	3.07297	0.2
5	Up_Country	Dry	6.8298	80.7472	1615	U3	U-N-3-2	December,2016	0.3	477.262	18.4946	22.4434	415.797	0.463623	7.4137	29.2082	1775.75	0.207436	12.8126	170.952	0.941018	440.405	8.27858	82.8174
6	Up_Country	Dry	6.8298	80.7472	1615	U3	U-N-3-3	December,2016	0.3	1775.47	24.8946	24.9659	646.24	0.881201	51.1644	10.7175	1987.21	0.1	6.87606	178.195	0.435891	347.291	4.38499	0.2
7	Up_Country	Dry	6.8932	80.583	1287	U4	U-P-1-1	December,2016	0.675336	540.332	21.7072	22.114	390.736	0.327729	10.0834	34.8299	1389.59	0.1	14.457	273.723	0.506699	99.092	11.001	3.77558
8	Up_Country	Dry	6.8932	80.583	1287	U4	U-P-1-2	December,2016	0.3	1847.21	68.2269	27.3276	1152.32	1.82939	153.635	0.5	1617.92	0.203884	8.16566	179.511	0.13412	80.5594	1.54821	0.2
9	Up_Country	Dry	6.8908	80.8026	1848	U5	U-P-2-1	December,2016	2.70134	465.952	25.6565	18.9854	414.496	0.435645	10.8604	19.0622	1237.84	1.03718	12.2184	129.883	1.67939	53.7048	7.76722	4.94301
10	Up_Country	Dry	6.8908	80.8026	1848	U5	U-P-2-2	December,2016	0.3	1902.9	31.914	30.315	930.505	1.227	56.8275	6.18271	1608.31	0.203884	1.79062	200.226	1.67653	69.3921	7.8947	0.2
11	Up_Country	Dry	6.8585	80.8309	1895	U6	U-P-3-1	December,2016	2.02601	496.319	18.8706	21.6475	713.002	0.507591	8.69907	25.6626	1687.44	1.86694	11.4461	195.818	0.564607	69.9777	5.75395	5.89322
12	Up_Country	Dry	6.8585	80.8309	1895	U6	U-P-3-2	December,2016	0.950963	1935.15	32.2765	25.0005	815.355	1.04853	56.6045	0.949814	2284.4	0.1	7.8073	203.704	0.637076	65.97	3.30326	0.2
13	Dry_Zone	Dry	7.9147	81.036	62	D1	D-N-1-1	June,2015	1.35067	520.903	17.3179	25.4076	407.224	0.367699	6.42505	17.134	1227.99	0.103718	11.961	223.493	2.80874	259.335	1.53214	3.62511
14	Dry_Zone	Dry	7.9147	81.036	62	D1	D-N-1-2	June,2015	0.3	518.932	19.3937	29.3056	477.583	0.459627	8.17644	26.0444	1498.87	0.518591	16.24	255.863	8.00747	318.967	18.9085	2.22733
15	Dry_Zone	Dry	7.9147	81.036	62	D1	D-N-1-3	June,2015	0.675336	487.094	20.7506	30.2662	416.149	0.451633	11.4396	25.0029	1799.07	0.622309	14.0606	277.763	1.66491	369.774	3.77178	4.63516
16	Dry_Zone	Dry	8.4307	80.2562	74	D2	D-N-2-1	June,2015	0.675336	470.425	22.2302	29.525	422.891	0.375693	8.21881	29.65	1813.57	0.622311	13.3276	372.825	0.144769	388.248	5.38319	2.80422
17	Dry_Zone	Dry	8.4307	80.2562	74	D2	D-N-2-2	June,2015	1.35067	504.817	20.5462	29.1408	560.662	0.415661	9.19349	24.0489	1700.17	0.207437	16.0615	353.364	0.839676	323.808	7.40479	1.4646
18	Dry_Zone	Dry	8.4307	80.2562	74	D2	D-N-2-3	June,2015	0.3	559.677	17.9797	49.4334	656.58	0.383686	6.87702	21.8957	1722.53	1.24462	14.1201	373.218	0.289539	320.922	5.16929	1.22348
19	Dry_Zone	Dry	8.4558	80.4135	87	D3	D-N-3-1	June,2015	2.70134	579.295	16.5659	27.7956	418.075	0.615509	6.52392	33.9564	1450.76	0.518591	15.7641	270.816	1.23057	332.829	3.87603	1.83371
20	Dry_Zone	Dry	8.4558	80.4135	87	D3	D-N-3-2	June,2015	0.60898	341.308	18.4604	17.6148	687.348	0.297413	4.87035	10.0541	693.446	1.12756	2.3581	117.88	0.369357	141.659	2.95744	74.1658
21	Dry_Zone	Dry	8.4558	80.4135	87	D3	D-N-3-3	June,2015	0.3	388.549	14.4605	23.844	319.07	0.270066	5.23298	21.0245	943.874	0.375854	4.77132	188.199	0.165574	232.893	3.46538	0.2
22	Dry_Zone	Dry	7.9637	81.3546	30	D4	D-P-1-1	June,2015	2.02601	445.318	18.1758	30.1841	382.488	0.591527	7.07475	28.0351	1651.86	0.622313	16.3588	503.524	1.43327	238.28	11.8427	13.4569
23	Dry_Zone	Dry	7.9637	81.3546	30	D4	D-P-1-2	June,2015	0.675336	489.285	23.5793	49.0761	524.443	1.32304	6.96175	29.3336	2308.15	0.311155	16.1209	622.614	2.35988	283.53	9.27022	42.6511
24	Dry_Zone	Dry	7.9637	81.3546	30	D4	D-P-1-3	June,2015	2.70135	470.061	27.685	56.1633	463.694	0.691455	8.68496	36.8343	1388.6	0.414873	14.3776	357.979	1.37536	177.081	10.8826	1.85968
25	Dry_Zone	Dry	8.3034	80.4089	98	D5	D-P-A-1	June,2015	1.35067	484.774	22.4756	25.0782	339.229	0.467622	7.48437	51.5705	1563.45	0.207436	12.4761	548.655	1.53461	274.44	2.50554	9.18684
26	Dry_Zone	Dry	8.3034	80.4089	98	D5	D-P-A-2	June,2015	1.21795	342.379	13.7859	19.391	361.579	0.266646	4.96704	16.6058	1252.75	0.563779	3.74751	487.078	0.127363	253.208	3.79565	0.2
27	Dry_Zone	Dry	8.3434	80.2562	93	D6	D-P-B-1	June,2015	0.675336	552.688	16.6152	21.7297	511.541	0.51159	9.08046	21.2417	1401.87	0.414873	10.3564	338.347	2.72187	199.057	5.01319	6.70796
28	Dry_Zone	Dry	8.3434	80.2562	93	D6	D-P-B-2	June,2015	0.608975	433.641	16.5959	30.5484	973.509	0.324763	5.4989	13.7616	1421.52	0.375853	5.44798	292.072	1.01894	185.41	5.9896	0.2
29	Dry_Zone	Dry	8.3434	80.2562	93	D6	D-P-B-3	June,2015	1.21795	510.659	13.167	22.1386	378.783	0.239298	4.955	125.755	1370.8	0.1	6.58147	291.858	0.853356	164.584	3.56614	0.2
30	Dry_Zone	Dry	8.4584	80.414	92	D7	D-P-C-1	June,2015	0.3	469.818	21.1428	41.4962	423.983	0.447637	9.34889	27.1297	1878.77	0.103718	20.3409	1239	2.51916	287.904	3.38633	2.83501
31	Dry_Zone	Dry	8.4584	80.414	92	D7	D-P-C-2	June,2015	0.3	586.242	15.2812	41.1411	430.341	0.376044	5.54731	18.3841	1193.3	0.281889	10.9518	692.11	1.78319	225.166	2.55205	0.2
32	Dry_Zone	Dry	8.4584	80.414	92	D7	D-P-C-3	June,2015	0.60898	418.419	39.6797	37.4439	563.421	0.239297	8.18263	22.4248	1533.43	0.375853	13.6588	730.795	0.713251	220.854	2.84895	0.2
33	Mid_Country	Dry	7.2555	80.7801	450	M1	M-7-1	June,2016	6.49903	2396.67	308.252	80.3244	2420.6	2.70213	89.3178	206.849	9292.43	10.1782	18.8286	489.647	0.827288	376.546	11.7463	0.309508
34	Mid_Country	Dry	7.2555	80.7801	450	M1	M-7-2	June,2016	3.54966	2084.21	101.093	70.7407	1996.79	2.1673	37.1147	125.887	2840.09	8.47247	12.9958	373.153	0.609803	278.035	11.5254	0.221156
35	Mid_Country	Dry	7.2555	80.7801	450	M1	M-7-3	June,2016	3.82159	2238.58	179.668	82.342	2556.18	4.29396	98.2556	109.885	2863.88	9.71605	11.7678	376.983	0.699355	265.06	16.1325	0.244543
36	Mid_Country	Dry	7.2699	80.7201	446	M2	M-8-1	June,2016	2.85471	1853.96	230.516	124.711	2494.18	4.15504	265.995	87.5573	2497.47	13.7493	12.0748	671.757	2.68233	426.592	23.5331	0.359749
37	Mid_Country	Dry	7.2699	80.7201	446	M2	M-8-2	June,2016	3.46667	2120.7	134.958	107.399	2150.1	2.77557	55.8722	96.8766	2887.24	13.2536	17.2937	786.08	0.872064	499.909	12.9909	0.353974
38	Mid_Country	Dry	7.2699	80.7201	446	M2	M-8-3	June,2016	3.86747	2727.54	172.744	124.09	3093.06	3.19546	55.6947	94.1238	2571.54	16.9172	13.6098	694.686	0.552234	439.174	19.0983	0.60837
39	Mid_Country	Dry	7.2409	80.7163	487	M3	M-9-1	June,2016	2.6368	1785.38	4332.45	706.107	12496.9	55.2854	5445.43	174.452	3567.33	17.9171	84.8321	426.978	3.73782	379.755	16.9837	0.557834
40	Mid_Country	Dry	7.2409	80.7163	487	M3	M-9-2	June,2016	5.04171	2486.1	412.577	126.587	3005.83	4.60213	114.859	129.976	4286.31	16.3878	29.2662	573.787	1.46055	538.67	19.1369	0.32741
41	Mid_Country	Dry	7.2409	80.7163	487	M3	M-9-3	June,2016	2.86146	2408.92	613.303	131.355	2762.38	5.44204	272.673	108.868	3654.14	14.0014	24.6614	476.975	0.980806	485.973	12.0527	0.234148
42	Mid_Country	Dry	7.2524	80.6058	597	M4	M-10-1	June,2016	3.21567	2299.24	2878.6	207.145	6385.66	30.151	671.609	185.18	2149.58	13.0267	16.9867	315.262	7.23067	633.003	30.3707	0.684895
43	Mid_Country	Dry	7.2524	80.6058	597	M4	M-10-2	June,2016	2.83043	2219.38	323.413	99.0909	2602.16	3.42697	83.9376	109.01	2792.75	8.20359	16.9867	363.452	0.93603	396.543	11.1749	0.217691
44	Mid_Country	Dry	7.2524	80.6058	597	M4	M-10-3	June,2016	3.48421	1919.56	1136.65	152.519	3234.15	7.1827	465.731	127.574	2971.25	13.1779	15.1447	461.855	0.980805	484.956	10.0642	0.302867
45	Mid_Country	Dry	7.2527	80.6084	584	M5	M-11-1	June,2016	2.94309	2231.46	144.747	71.3806	2082.49	2.37325	53.9896	70.4066	1865.14	10.6151	8.69796	291.768	1.42857	369.74	14.0248	0.316149
46	Mid_Country	Dry	7.2527	80.6084	584	M5	M-11-2	June,2016	3.45722	2437.88	1148.43	138.322	4389.61	5.45161	257.374	86.9651	2943.05	15.3543	10.2329	498.911	1.46055	546.628	17.4398	0.344734
47	Mid_Country	Dry	7.2527	80.6084	584	M5	M-11-3	June,2016	4.78794	1964.05	493.847	151.003	3117.15	11.6615	262.812	82.0454	2090.52	11.2873	10.5399	366.204	1.05757	335.148	13.5791	0.222599
48	Mid_Country	Dry	7.267	80.6009	480	M6	M-12-1	June,2016	2.02628	2141.31	192.332	99.9887	2336.51	3.64251	101.926	99.4957	2016.06	15.9592	24.0474	532.778	0.923236	370.075	21.7508	0.420675
49	Mid_Country	Dry	7.267	80.6009	480	M6	M-12-2	June,2016	2.54775	2326.73	193.539	97.0235	2524.09	3.10286	58.44	94.1922	2004.95	10.8252	27.4243	520.832	0.820891	337.086	16.7464	0.263888
50	Mid_Country	Dry	7.267	80.6009	480	M6	M-12-3	September,2016	3.96464	2467.26	821.251	125.425	3499.66	7.78321	170.7	108.954	2311.93	11.3714	19.4425	569.094	1.01279	339.354	14.7113	0.230973
51	Coconut_Triangle	Dry	7.2968	80.0007	40	C1	C-N-4-1	July,2016	4.4748	3331.54	606.186	249.488	4775.8	30.6183	707.766	140.435	2809.24	16.2954	22.8194	432.561	5.85525	343.593	26.9469	2.88001
52	Coconut_Triangle	Dry	7.2968	80.0007	40	C1	C-N-4-2	July,2016	3.56386	2150.98	802.623	322.576	3840.51	23.5717	1980.65	111.138	2869.55	15.1862	41.8529	400.884	12.272	320.012	21.393	1.25155
53	Coconut_Triangle	Dry	7.2968	80.0007	40	C1	C-N-4-3	July,2016	2.58823	2624.61	1212.35	325.376	6477.84	21.3637	1652.33	149.927	2932.51	11.9595	36.634	488.806	2.145	371.584	14.942	1.81197
54	Coconut_Triangle	Dry	7.3886	80.1067	75	C2	C-N-5-1	July,2016	4.45726	1988.6	13607.5	330.816	23655.5	28.9627	2429.64	254.586	2741.99	16.5054	43.0808	433.602	26.0805	369.89	17.348	1.53637
55	Coconut_Triangle	Dry	7.3886	80.1067	75	C2	C-N-5-2	July,2016	6.2938	2406.86	429.992	95.4753	2725.8	4.7091	112.973	96.7463	2531.29	13.1779	16.9867	339.702	4.21759	312.1	47.1277	1.35438
56	Coconut_Triangle	Dry	7.3886	80.1067	75	C2	C-N-5-3	July,2016	7.7467	5106.83	679.022	250.652	4820.43	32.8373	753.779	140.184	3130.82	18.5893	29.5732	460.572	5.74649	407.552	25.6552	1.04214
57	Coconut_Triangle	Dry	7.7337	80.1375	59	C3	C-N-6-1	July,2016	4.29057	1685.27	237.947	89.7791	2330.76	3.89159	140.375	76.9544	3590.52	16.3206	19.1356	604.561	1.07036	401.41	19.9573	0.463122
58	Coconut_Triangle	Dry	7.7337	80.1375	59	C3	C-N-6-2	July,2016	4.09893	1985.28	116.648	92.6856	1748.39	2.2583	48.5102	98.2812	3235.65	11.3378	15.4517	620.207	1.12793	381.805	19.9418	0.408836
59	Coconut_Triangle	Dry	7.7337	80.1375	59	C3	C-N-6-3	July,2016	4.62125	2058.78	989.267	135.754	3765.08	17.6489	400.261	91.6293	3265.84	13.346	21.2845	622.192	1.67165	395.36	13.838	0.464854
60	Coconut_Triangle	Dry	7.9254	80.1754	71	C4	C-P-4-1	July,2016	6.42547	2126.81	879.781	203.576	4747.01	26.9266	541.787	92.6303	2723.02	12.7326	29.5732	1435.37	2.38808	541.918	27.0672	2.0879
61	Coconut_Triangle	Dry	7.9254	80.1754	71	C4	C-P-4-2	July,2016	4.41406	2032.84	214.852	96.0575	2430.58	4.76021	83.543	95.6955	2985.6	10.4639	46.1508	2075.71	4.29435	766.207	18.4915	1.46761
62	Coconut_Triangle	Dry	7.9254	80.1754	71	C4	C-P-4-3	July,2016	6.68806	1877.86	205.975	93.7625	2161.26	6.74192	125.909	65.3107	2710.18	16.9508	36.0201	1273.28	0.948823	495.069	16.1292	0.686627
63	Coconut_Triangle	Dry	7.5741	80.3827	103	C5	C-P-5-1	July,2016	6.16962	1802.48	116.311	75.6193	1937.97	2.19763	46.7659	85.6799	2656.26	12.3377	30.4942	808.282	1.28145	450.632	16.6252	0.63407
64	Coconut_Triangle	Dry	7.5741	80.3827	103	C5	C-P-5-2	July,2016	6.24858	1489.55	192.841	80.7365	2025.78	3.26092	79.6522	101.234	3311	11.8251	37.555	936.984	2.62476	523.496	17.7561	0.541086
65	Coconut_Triangle	Dry	7.5741	80.3827	103	C5	CP-5-3	July,2016	8.7252	2210.35	159.636	90.7104	2244.31	3.58663	73.7452	118.818	3066.94	16.1441	31.1082	963.427	1.9531	518.919	25.9578	0.907266
66	Coconut_Triangle	Dry	7.5767	80.3893	106	C6	C-P-6-1	July,2016	2.56799	1701.42	767.218	114.443	3403.51	6.13828	373.912	65.748	2816.73	9.44716	17.6006	570.719	1.65885	308.58	10.2858	0.429048
67	Coconut_Triangle	Dry	7.5767	80.3893	106	C6	C-P-6-2	July,2016	5.59584	2320.66	338.356	131.01	2464.64	9.53694	213.973	83.766	3123.96	6.67432	16.3727	468.99	1.47974	394.845	15.4352	0.305466
68	Coconut_Triangle	Dry	7.5767	80.3893	106	C6	C-P-6-3	July,2016	4.83924	1620.45	155.215	86.5916	1666.7	2.10344	39.1837	98.2982	2145.05	17.9675	11.4609	509.843	1.02558	360.835	12.4461	0.407681
